1

2

3 Title: Male success against con- and heterospecific competitors indicates a positive but modest role for  
4 sexual selection as driver of speciation

5

6 RRH: Sexual selection and species isolation

7 Keywords: speciation; reproductive isolation; sexual selection; sperm competition; remating

8

9 Jeremy S. Davis\*, Leonie C. Moyle

10 Dept. of Biology, Indiana University, Bloomington, IN, USA 47405

11

12 \*Corresponding author: [jsd2@indiana.edu](mailto:jsd2@indiana.edu)

13

14 Data archiving: no data to archive.

15

16

17 **Abstract**

18 For sexual selection within species to drive the evolution of reproductive isolation between lineages,  
19 sexually selected and reproductive isolating traits must both share underlying mechanisms and operate  
20 in the same direction. While some work has been done to evaluate mechanistic overlap, fewer studies  
21 have evaluated whether intraspecific sexually-selected variation is associated with elevated  
22 reproductive isolation between species. Here we evaluate this association by assessing the relationship  
23 between male reproductive success against conspecifics versus heterospecific males at each of two  
24 different mating stages. We find that male precopulatory performance (remating success following a  
25 conspecific versus a heterospecific first mating) was not associated between conspecific and  
26 heterospecific contexts, but postcopulatory success (sperm competition against conspecific versus  
27 heterospecific males) was modestly positively correlated. We discuss two lines of evidence that suggest  
28 this modest association is due to incomplete mechanistic overlap between postcopulatory competition  
29 in conspecific and heterospecific mating contexts. This study provides an explicit test of a necessary  
30 condition for sexual selection to drive speciation, and finds that while sexual selection is not individually  
31 sufficient to explain the magnitude of reproductive isolation in this system, it could nonetheless  
32 facilitate the evolution of isolation via postcopulatory sperm competition.

33

34

35 **Introduction**

36 Sexual selection is frequently proposed as a powerful driver of speciation (Ritchie 2007),  
37 however for this to be the case, two conditions must be met. First, traits that are the target of sexual  
38 selection must also be involved in reproductive isolation, so that the two processes share mechanisms  
39 and underlying genes in common. Second, sexual selection and reproductive isolation must act in the  
40 same direction. In particular, in order to drive speciation, sexual selection must favor trait changes  
41 within species that act to amplify reproductive isolation between species. Some empirical studies have  
42 generated evidence that sexual selection and species reproductive isolation act via shared traits,  
43 mechanisms, and/or genes (Groot et al. 2013, Arbuthnott 2009, Castillo and Moyle 2014, and see  
44 below), although whether they are sufficiently mechanistically coupled for sexual selection alone to  
45 drive isolation remains equivocal (Panhuis et al. 2001, Ritchie 2007, Bolnick and Kirkpatrick 2012, Saffran  
46 et al. 2013). Moreover, it is equally unclear that the direction of sexual selection and reproductive  
47 isolation will consistently align; theory suggests that they might act at cross purposes under some  
48 conditions (Servedio and Burger 2014), but there are few empirical studies that explicitly examine the  
49 strength and direction of association between traits that mediate sexual success within and between  
50 species.

51 A range of sexual traits could potentially be involved in both intraspecific reproductive  
52 performance and reproductive isolation against heterospecifics. In particular, studies of precopulatory  
53 traits (reviewed Ritchie 2007), especially male traits related to courtship, have produced some evidence  
54 that male signal traits that are strongly preferred by conspecific females also strongly contribute to  
55 interspecies mating isolation (e.g. *Laupala* crickets: Mendelson and Shaw 2005, Shaw and Parsons 2002).  
56 Nonetheless, other less examined mating interactions might also play an influential role in both  
57 intraspecific mating success and interspecific reproductive barriers. Remating in *Drosophila* offers a  
58 context within which to investigate multiple such mating traits with consequences for both conspecific

59 and heterospecific interactions. Among *Drosophila*, remating is a common sexual strategy. In *Drosophila*  
60 *melanogaster*, paternity tests from natural field collected females indicate that most have mated  
61 between 2 to 6 times (Imhof et al. 1997, Harshman and Clark 1998), while remating estimates are >80%  
62 in laboratory settings (reviewed Singh et. al. 2002). Accordingly, the majority of matings are expected to  
63 be rematings, making male performance in remating contexts an important aspect of lifetime fitness. To  
64 secure offspring with a female that has previously mated, a second male needs both to successfully  
65 court this female and, once mated, to effectively displace the sperm of the first mated male (referred to  
66 as ‘offensive’ sperm competition; Boorman and Parker 1976). In the initial (pre-copulatory) interaction,  
67 the male must convince the female—via acoustic, visual, and chemical cues—to accept a second mating,  
68 despite potentially detrimental effects to her and despite biochemical manipulation by the first male  
69 that decreases her receptivity (Parker and Partridge 1998, Sirot et al. 2009). Because remating provides  
70 females with a degree of control over paternity of offspring, especially when the first male is deemed  
71 suboptimal (Fricke et al. 2006), female remating decisions likely involve an assessment of the quality of  
72 the second male. In interactions with conspecifics alone, this assessment can be based on factors such  
73 as sperm depletion (when a first mating was not recent; Clark et al. 1999, Gromko and Markow 1993) but  
74 also on optimizing mating with the highest quality males (‘trading up’ Byrne and Rice 2005). However,  
75 it's unclear whether the same performance characters would be assessed, or assessed to the same  
76 degree, by females whose first mating was with a heterospecific male—a mating context that is almost  
77 always suboptimal. If females evaluate different qualities when choosing remating partners depending  
78 on whether a first male was conspecific or heterospecific, sexual selection on precopulatory remating  
79 traits need not act in the same direction as reproductive isolation.

80           Following a successful remating event, a second male must also outcompete the first male in  
81 sperm competition. In *Drosophila*, it is well documented that the second (or ‘P2’) male frequently sires  
82 more offspring than the first (‘P1’) male (a phenomenon referred to as ‘P2 precedence’), whether the

83 first mating is conspecific or heterospecific (Price et al. 1999, Price 1997). Nonetheless, P2 success  
84 against conspecifics can vary among males, depending upon the factors such as condition and sperm  
85 count (Letsinger and Gromko 1985) as well as female genotype (Clark et al. 1999, Bjork et al. 2007). In  
86 contrast to intraspecific sperm competition, second mated conspecifics almost always sire the majority  
87 of offspring following a first heterospecific mating, a phenomenon known as conspecific sperm  
88 precedence (Price 1997). This phenotypic observation suggests that sperm competition between  
89 conspecifics and heterospecifics might not be based on identical mechanisms. Indeed, it has been shown  
90 that *Drosophila* females manipulate and store sperm differently depending upon whether it is from  
91 conspecific versus heterospecific males (Manier et al. 2013a). Nonetheless, intraspecific sperm  
92 competition in *Drosophila melanogaster* is also well characterized at the genetic level (Begun et al. 2000,  
93 Findlay et al 2008), and it has been shown that genes mediating intraspecific sperm competition  
94 (Wolfner 1997, Neubaum and Wolfner 1999) also significantly affect the efficacy of conspecific sperm  
95 precedence (Castillo and Moyle 2014; Civetta and Finn 2014, and see Discussion). Pre- and  
96 postcopulatory remating success therefore offers a model for investigating mating traits in parallel for  
97 their role in both intraspecific and interspecific reproductive interactions.

98         Here we evaluated the potential link between these male reproductive traits in conspecific and  
99 heterospecific mating contexts, using a worldwide set of fifteen *Drosophila melanogaster* populations.  
100 To focus specifically on male performance traits, we examined remating success and offensive sperm  
101 competition in males from these different populations, all with a single female line and all against a  
102 standard conspecific and heterospecific first male genotype. We first evaluated evidence for variation  
103 among lines in pre- and postcopulatory male competitive traits against both conspecific and  
104 heterospecific males. With these data, we examined whether male success against conspecific first  
105 males was associated with success against heterospecific first males. By examining two different male  
106 performance traits, we were able to assess if either of these phenotypes meets the requirement for

107 sexual selection to drive speciation—that these traits act in the same direction—and whether male  
108 reproductive success differences against conspecifics are alone sufficient to explain patterns of  
109 reproductive isolation. Finally, we also evaluated non-competitive male fecundity, to confirm that male  
110 sexual success was specifically due to male traits mediating competitive interactions. Based on our  
111 findings, as well as previous theoretical and empirical work, we identify several general conditions which  
112 might favor a positive relationship between sexual selection and reproductive isolation, and therefore  
113 enable a role for sexual selection in the evolution of strengthened reproductive barriers. Nonetheless,  
114 we conclude that even under such conditions, sexual selection is unlikely to be sufficient to drive  
115 reproductive isolation on its own.

116

## 117 **Methods**

### 118 *Fly stocks and maintenance*

119 All fly stocks were reared on standard cornmeal media prepared by the Bloomington Drosophila  
120 Stock Center (BDSC) at Indiana University, and were kept at room temperature (~22C). Fourteen of our  
121 Drosophila melanogaster experimental male lines were drawn from the founder lines of the Drosophila  
122 Synthetic Population Resource (King et al. 2012; and provided by Stuart MacDonald) and were chosen as  
123 they represent a diverse sample of worldwide populations with genome sequence data for downstream  
124 studies (see Figure 1 for locations of origin). The fifteenth male line was the Austria w132 line, originally  
125 collected by Christian Schlotterer and donated to us by Kristi Montooth (University of Nebraska –  
126 Lincoln). This line was also used as the female genotype in all trials in this study. P1 male lines for  
127 intraspecific and interspecific competition trials were Green Fluorescent Protein (GFP) labeled *D.*  
128 *melanogaster* 32170 (obtained from the BDSC) and *D. simulans* 14021-0251.2663 (obtained from the  
129 University of California San Diego *Drosophila* species stock center), respectively. The same female line,  
130 and first male *D. melanogaster* and *D. simulans* GFP lines, were used in Castillo and Moyle's (2014)

131 analysis of the role of three known sperm competition loci in the expression of conspecific sperm  
132 precedence.

133

#### 134 *Male intra- and interspecific performance assays*

135 To assess differences in offensive competitive ability of males from our 15 target lines, our assay  
136 evaluated siring success of male lines with tester (Austria w132) *D. melanogaster* females following a  
137 first mating with either a GFP-marked male *D. melanogaster* (to assess intraspecific sexual competition)  
138 or *D. simulans* (to assess interspecific sexual interactions). The intra- and interspecific assays were  
139 designed so that the only difference between them was the identity of the first (P1) male, enabling us to  
140 directly compare the relative competitive success of each target male line against a common  
141 heterospecific and conspecific male tester genotype (Figure 1).

142 For first matings, virgin female Austria flies, GFP male *D. melanogaster* flies (for intraspecific  
143 trials), and GFP male *D. simulans* flies (for interspecific trials), were isolated 1 day prior to first mating. 4-  
144 6 virgin females and 4-6 males (either *D. melanogaster* or *D. simulans* P1 genotypes) were housed in a  
145 single vial and allowed to mate for 3 days. Females were then removed singly to individual blue-dyed  
146 food vials and allowed to oviposit for 24 hours, then checked for eggs to ensure at least one mating had  
147 occurred with a GFP-labeled first male. Females that did not oviposit were recorded as 'unmated' and  
148 removed from the remainder of the experiment (Figure 1). Females confirmed to have mated were then  
149 moved to a new vial to be singly paired with a virgin male from one of the 15 target male lines. The  
150 second pairing was maintained for 24 hours, after which the male was removed and the female moved  
151 to a new vial for 24 hours. Each female was then moved to a new vial every 24 hours for two additional  
152 days, for a total of 4 days of oviposition (3 of these after contact with second male). Progeny from all  
153 four vials were allowed to mature into adulthood and, upon eclosion, all adult individuals were gently  
154 anesthetized and viewed under a Leica M205FA stereo scope equipped with a UV light for visualizing

155 GFP. The presence or absence of GFP in the ocelli of the eye was used as a marker of paternity; progeny  
156 with GFP ocelli must have been sired by the first mated (P1) GFP-labelled male, whereas progeny with  
157 wildtype ocelli are counted as progeny of the target male populations. For each timepoint per trial—the  
158 post-P1 blue vial and 3 post-remating vials—each progeny individual was scored for presence or  
159 absence of GFP in the ocelli. In instances where no wildtype offspring were observed in the 3 post-  
160 remating vials, we assumed that a successful remating event with the second male did not occur, and  
161 these were scored as ‘unremated’ (Figure 1). Both intra- and interspecific trials were repeated until at  
162 least 5 successful replicates (i.e. trials in which there was evidence that a second/remating event  
163 occurred) for each focal (second) male line were obtained.

164

#### 165 *Estimating variation in first mating frequency*

166 Because our experiment was designed so that post-conspecific and -heterospecific mating  
167 assessments were entirely parallel, the first pairing involved multiple males and females (4-6 each) for  
168 both conspecific (GFP *D. melanogaster* males) and heterospecific (GFP *D. simulans*) first matings. The  
169 latter was used to ensure that heterospecific matings occurred at a reasonable frequency, however a  
170 corollary effect is that females in conspecific first pairings might have experienced >1 copulations within  
171 the 3 day co-housing period. Because we did not directly observe matings, we used a secondary assay to  
172 estimate the number of conspecific males each female likely mated with during these first pairings, as  
173 follows: 5 virgin Austria females were paired with 5 conspecific males that were a mix of GFP males and  
174 males from a single focal line (either 2 GFP/3 focal, or 3 GFP/2 focal), and kept co-housed for 3 days as  
175 above. A total of 54 paired trials were run (half of 3 GFP/2 focal males, and half of 2 GFP/3 focal males).  
176 Within these 27 pairs of trials, focal males were drawn from four of our lines: Austria (10/27 pairs) and  
177 California (7/27 pairs), and Israel (5/27) and Spain (5/27). Following mating, females were allowed to  
178 oviposit for 24 hours in individual vials. Upon eclosion, progeny were assessed for presence versus



179 absence of GFP in the ocelli; each trial was then scored as ‘GFP’, ‘WT’ or ‘mixed’ matings based on the  
180 types of progeny found in the offspring. This procedure was not performed for heterospecific first  
181 matings, as the mating rate was low enough that females were assumed to be singly mated.

182 Assay results—the number of females that produced only monotypic versus mixed offspring—  
183 were used to estimate the likely number of copulations per female in these first mating trials, based on  
184 the general expectation that fewer mixed versus monotypic offspring broods is consistent with a lower  
185 frequency of females that have copulated more than once. We found that 16/54 trials produced ‘mixed’  
186 offspring, all of which must have been the product of at least two copulations; the remaining females  
187 produced monotypic offspring (16/54 all GFP-labelled, and 22/54 all wild type). From these  
188 observations, and some simplifying assumptions (see Supplementary text), we infer that the majority of  
189 females mate either 1 or 2 times in first mating trial (for example, we estimate 48% are single matings),  
190 whereas the likely frequency of three copulations is low (Supplementary text).

191

### 192 *Quantifying male competitive success*

193 We used success of second males in securing a remating as our data for offensive precopulatory  
194 success, for each male line. In particular, we tallied the number of second mating trials where there was  
195 at least one non-GFP offspring in subsequent vials—indicating a second mating with the target male—  
196 versus the number of trials that had only GFP offspring (unremated). The number of successes and  
197 failures were compared among male lines and between intra- and interspecific assays to determine if  
198 either second male line identity or identity of first male (conspecific vs. heterospecific) affected mean  
199 success in obtaining a remating (see analyses below).

200 We used the proportion of offspring sired after the second mating to estimate offensive  
201 postcopulatory (sperm competitive) success. For all trials in which a second (focal male) was successful  
202 at remating (i.e., for which there was at least one non-GFP labelled offspring in post-remating vials), the

203 proportion of all adult flies that were wild-type versus GFP (tallied across the 3 post-remating vials) was  
204 calculated as an estimate of postcopulatory siring success, either in competition with conspecific (for  
205 intraspecific trials) or heterospecific (interspecific trials) males.

206

#### 207 *Non-competitive male fecundity assay*

208 To determine if our competitive male phenotypes were associated with non-competitive male  
209 fecundity, we assessed fecundity for each of the 15 target male lines when singly mated with the tester  
210 female line Austria w132. Virgin males and females were isolated and housed individually for 24 hours  
211 to reach maturity, prior to being aspirated into individual vials that contained one Austria female and a  
212 single male of a focal line. Each pair was then co-housed for 24 hours on standard media, after which  
213 the male was removed and the female allowed an additional 24 hours to oviposit before being removed.  
214 We assessed male fecundity at two stages—average number of eggs produced by an inseminated  
215 female and total adult offspring produced—in each assay, allowing us to also verify that adult progeny  
216 counts reflect successful fertilization events. Fecundity assays were performed for at least 5 replicates  
217 for each male line. We found that egg count and adult offspring count were quantitatively  
218 indistinguishable (i.e., with few exceptions, all eggs developed into adulthood), therefore non-  
219 competitive fecundity measures used in all subsequent analyses were based on adult offspring count  
220 (see Supplementary Text for egg data).

221

#### 222 *Statistical analyses*

##### 223 *Phenotypic variance for pre- and postcopulatory success:*

224 We used a  $\chi^2$  test of independence to evaluate whether our 15 focal male lines differed in their  
225 mean precopulatory success at obtaining a second mating following a first mating with a tester  
226 conspecific male line (intraspecific trials), or following a first mating with a tester heterospecific male

227 line (interspecific trials.) To evaluate whether male lines differed in postcopulatory offensive sperm  
228 competitive ability, we used analyses of variance (ANOVA) to assess whether identity of focal male  
229 genotype significantly affects the mean proportion of progeny sired by the second (P2) male. ANOVAs  
230 were performed separately for sperm competitive success following conspecific and heterospecific first  
231 matings, on a logit transformation of the proportion of offspring sired by the target male (i.e., not GFP  
232 labelled). To assess whether focal male lines differed in non-competitive fecundity, we used an ANOVA  
233 to assess whether focal male genotype significantly affected the mean number of adult offspring  
234 produced within 24 hours of a single non-competitive mating. For completeness, we also evaluated  
235 whether variation in either con- or heterospecific success at either mating stage was associated with  
236 global geographical patterns, and found that neither continent of origin, nor temperate versus tropical  
237 origin, significantly predicted competitive success in any of these cases (data not shown).

238

239 *Relationship between male performance after intraspecific versus interspecific matings, and between*  
240 *pre- versus post-copulatory success:*

241 For both pre- and postcopulatory success traits we used Pearson's correlation coefficient to  
242 assess the association between line means for reproductive phenotype following intraspecific versus  
243 interspecific first matings. For the male precopulatory success data, we assessed the correlation  
244 between proportion successful remating after conspecific trials versus after heterospecific trials, using  
245 line mean values. For postcopulatory success, we tested for a correlation between line mean siring  
246 success against conspecific versus heterospecific males. Within each class of interaction (intraspecific or  
247 interspecific) we also evaluated the correlation between pre- and postcopulatory success phenotypes  
248 using a Pearson's correlation coefficient. Because assessing the correlation between mean phenotypes  
249 in these analyses does not take into account any within-line variance exhibited for postcopulatory  
250 phenotypes in our dataset, we also performed several bootstrap analyses to assess the effect of within-

251 line (among-individual male) variance on the strength of these associations between male performance  
252 phenotypes (see Supplementary text).

253

254 *Relationship between competitive and non-competitive male reproductive performance traits:*

255 To assess the relationship, if any, between non-competitive male performance and success in

256 offensive reproductive interactions, we evaluated the correlation between male non-competitive

257 fecundity and both pre- and postcopulatory success traits when competing against conspecifics. For

258 each we computed a Pearson's correlation coefficient between average fecundity of each male line

259 (after single matings) against the logit transformation of proportion data for either pre- or post-

260 copulatory success following a conspecific first mating. For completeness, we also examined the

261 relationship between non-competitive fecundity and male pre- and postcopulatory success following a

262 heterospecific first mating.

263

## 264 **Results**

265 *Significant variation among male lines for reproductive success traits*

266 We found significant phenotypic variance between focal male lines in their ability to secure a

267 mating following conspecific ( $\chi^2 = 24.784$ ;  $P = 0.037$ ) and following heterospecific ( $\chi^2 = 23.804$ ;  $P = 0.048$ )

268 first matings (Figure 2). Following conspecific first matings, precopulatory success ranged from 0.217 to

269 0.857, with the majority of populations exhibiting a relatively high success rate (>0.6) but Colombia,

270 Spain, South Africa, Israel, and Malaysia performing more poorly. The proportion of successful remating

271 attempts following heterospecific males ranged from a perfect success rate (shared by 5 of the

272 populations) down to 0.5 for the Colombia male line (Table 1).

273 We also found significant phenotypic variation between focal male lines in their postcopulatory

274 success as the second (offensive) male genotype, against both conspecific first males ( $F(14, 45.937)$ ;  $P =$

275 0.022) and against heterospecific first males ( $F(14, 25.989)$ ;  $P = 0.007$ ) (Figure 3). Interestingly, for  
276 postcopulatory success against conspecifics only, this was accompanied by a relatively high variance in  
277 performance among males within each line (Figure 3). Because this variation cannot be explained by  
278 male or female genotype effects, and the rearing environment of all flies was uniform, it might be due to  
279 variation among individual females in whether they had copulated once or twice prior to our remating  
280 assay (that is, within the initial 3-day pairing with conspecific tester males; see methods and  
281 supplement). Consistent with this, we see much less among-male within-line variation following  
282 heterospecific first matings, in which females are expected to only have mated once. Importantly,  
283 despite within-line male performance variation, we still detect significant line mean differences in pre-  
284 and postcopulatory success against the conspecific (GFP) tester male genotype.

285 In contrast to competitive male reproductive phenotypes at both pre- and postcopulatory  
286 stages, we found no significant difference among male lines in non-competitive fecundity ( $F(14, 1.006)$ ;  
287  $P = 0.459$ ).

288

289 *Positive but modest relationship between male sexual performance against conspecific males and*  
290 *heterospecific males*

291 To assess whether sexual selection and reproductive isolation could act in the same direction,  
292 we examined the relationship between success after conspecific versus heterospecific first matings for  
293 both pre- and postcopulatory traits. We found no significant correlation between precopulatory success  
294 after conspecific versus heterospecific first matings ( $r(13) = 0.450$ ,  $P = 0.090$ )(Figure 4). In contrast,  
295 mean male line values of postcopulatory success against conspecific first males versus against  
296 heterospecific first males were significantly positively associated ( $r(13) = 0.552$ ,  $P = 0.032$ )(Figure 5). This  
297 suggests that male lines that are on average better sperm competitors against conspecific males are also  
298 better able to displace heterospecific sperm.

299

300 *Postcopulatory success is associated with precopulatory success after conspecific first matings*

301 Because we assessed second male success in terms of both precopulatory and postcopulatory  
302 competitive ability, we could also evaluate whether these different sexual performance traits are  
303 associated with each other. For male performance after conspecific first matings, we found a significant  
304 correlation between remating success and sperm competitive ability ( $r(13) = 0.562, P = 0.029$ ). In  
305 contrast, pre- and postcopulatory success following heterospecific matings were not associated ( $r(13) =$   
306  $0.014, P = 0.959$ ) (Figure 6).

307

308 *Differences in remating and sperm competitive success are not determined by non-competitive male*  
309 *fecundity*

310 To better interpret the causes of variation in second male reproductive success, we evaluated  
311 whether male line variation in either precopulatory or postcopulatory success could be explained by  
312 differences in intrinsic, non-competitive male fecundity. We found no significant correlation between  
313 intrinsic fecundity and precopulatory remating success following conspecific ( $r(13) = 0.046, P = 0.870$ ) or  
314 heterospecific ( $r(13) = 0.476, P = 0.073$ ) first matings. We also found no correlation between non-  
315 competitive fecundity and postcopulatory success against either conspecific ( $r(13) = -0.047, P = 0.868$ ) or  
316 heterospecific ( $r(13) = 0.188, P = 0.503$ ) first males.

317

## 318 **Discussion**

319 Because of its effects on reproductive trait evolution, sexual selection is commonly invoked as a  
320 driver of speciation. However questions still remain about the mechanistic connection between  
321 conspecific and heterospecific sexual interactions, including whether sexual selection generally acts in  
322 the same or different directions as reproductive isolation. Here we examined phenotypic variation in,

323 and the relationship between, pre- and postcopulatory male performance in *Drosophila melanogaster*  
324 when competing against a conspecific or heterospecific first male. Although we found no significant  
325 association between precopulatory success—securing a remating—after a conspecific versus a  
326 heterospecific first mating (Figure 4), average postcopulatory competitive success was significantly  
327 positively associated between the two contexts (Figure 5). Our findings speak both to whether sexual  
328 selection could be expected to act in concert with, or in opposition to, reproductive isolation, and  
329 whether selection within species is individually sufficient to drive reproductive isolation. They also raise  
330 the question of why the male performance traits examined here might differ in their degree of coupling  
331 between conspecific and heterospecific mating contexts, and suggest conditions under which these  
332 positive associations are expected to be more or less likely. Overall, our results indicate that sexual  
333 selection on some male reproductive traits can facilitate the evolution of isolating barriers, but may be  
334 insufficient to drive isolation on its own.

335

336 *Intraspecific competitive success has a positive but modest contribution to reproductive isolation*

337         The specific connection between sexual selection and reproductive isolation determines  
338 whether sexual dynamics within species could shape the evolution of reproductive isolation between  
339 species, including facilitating or even constraining the emergence of isolating barriers. Our results  
340 indicate that, for the male performance traits we examined here, sexual selection does not appear to  
341 constrain reproductive isolation and could, for post-copulatory competitive traits, act to facilitate the  
342 expression of stronger reproductive isolation. Previous analyses have found mixed evidence for this  
343 association. While some theoretical work has suggested that sexual selection amplifies isolation under  
344 specific conditions (Gavrilets and Waxman 2002, Gavrilets 2000, Kondrashov and Shpak 1998, Higashi et  
345 al. 1999), other models indicate that sexual selection can oppose speciation, especially when strong  
346 female preferences reduce the variation in male mating traits that is required for reproductive isolation

347 to evolve (Servedio 2012, Kirkpatrick and Nuismer 2004, Servedio and Burger 2014). Interestingly, most  
348 of the latter predictions have been generated specifically in the context of divergence with gene flow  
349 (i.e. in partial sympatry); it is unclear whether similar expectations hold broadly in allopatry, where there  
350 is no direct or indirect selection for increased reproductive isolation but also where gene flow—  
351 including the movement of strong female preference alleles between species (e.g. Servedio and Burger  
352 2014)—does not oppose the build-up of isolation.

353         The few previous empirical assessments of relationships between sexually-selected traits and  
354 reproductive isolation have also produced variable findings. These differing outcomes mostly appear to  
355 depend on the specificity of female preferences for con- or heterospecific male traits in any given case.  
356 At least two studies have inferred that sexual selection works against reproductive isolation because an  
357 exaggerated male trait is preferred by both conspecific and heterospecific females in sympatry, thereby  
358 increasing the propensity for gene flow between species (*Girardinichthys*, Macias Garcia et al 2012; *O.*  
359 *pumilio*, Yang et al. 2016). In contrast, in both Laupala crickets (Mendelson and Shaw 2005, Shaw and  
360 Parsons 2002) and Tungara frogs (Boul et al. 2007), male signal traits that are strongly preferred within  
361 species are also used by females to discriminate against heterospecific males. While our analysis was not  
362 primarily designed to assess the pattern of female preferences for con- and heterospecific male traits,  
363 we found that the *D. melanogaster* female line we used generally chooses to remate with conspecific  
364 second males after a heterospecific first mating (i.e. more often than foregoing a second mating; Figure  
365 4), and strongly prefers the sperm of second conspecific males after heterospecific first matings (i.e.  
366 siring success against *D. simulans* is well above 50% for all conspecific male lines; Figure 5), regardless of  
367 the significant variation among male lines in their relative success in each phenotype. Together, our  
368 observations and these prior studies suggest that strong female preferences for conspecific male traits  
369 could help to facilitate positive associations between sexual selection and reproductive isolation. Note,  
370 however, that female preferences need not always be required, especially in the specific context of



371 sexual conflict over fertilization; for example, the sperm of *Caenorhabditis* lineages experiencing strong  
372 antagonistic selection on sperm competition traits have been shown to cause traumatic female sterility  
373 in heterospecifics (Ting et al. 2014), indicating that sexual antagonism acting within species can also  
374 produce isolation between species.

375         While our findings suggest that male sexual performance against conspecifics and  
376 heterospecifics can act in the same direction, at least for competitive fertilization traits, they also  
377 indicate a fairly modest association between sexually selected and reproductive isolating phenotypes.  
378 This observation implies that sexually selected intraspecific phenotypes can contribute to isolating  
379 barriers, but are likely insufficient to individually drive the reproductive isolation observed between  
380 species. Other studies that have investigated this general relationship—both theoretically and  
381 empirically—have made similar inferences (e.g. Bolnick and Kirkpatrick 2012). Using patterns of isolation  
382 observed in empirical examples, Bolnick and Kirkpatrick (2012) modelled the strength of intraspecific  
383 assortative mating that would be necessary to produce phenotypic differences sufficient to cause  
384 reproductive isolation, and showed that the magnitude of sexual selection fails to sufficiently explain the  
385 amount of reproductive isolation observed between lineages. Additional analytical theory and  
386 simulations suggest that male traits must be under both natural (divergent) selection and sexual  
387 selection in order to successfully contribute to isolation in sympatry (Kirkpatrick and Ravigne 2002;  
388 Servedio and Burger 2014; Servedio and Boughman 2017); sexual selection alone is insufficient to drive  
389 increases in isolation.

390         If sexual selection can be a positive but insufficient driver of isolation, it is important to examine  
391 the conditions under which sexual selection can be more effective (or less) at generating reproductive  
392 barriers. Interestingly, our data themselves suggest at least one other condition that could determine  
393 the strength of this association: the degree to which there are shared underlying mechanisms  
394 controlling competitive success against conspecifics versus heterospecifics. Below we discuss two lines

395 of evidence that suggest that varying degrees of mechanistic overlap between these mating contexts  
396 likely explains both the modest association we observed for postcopulatory traits, and lack of  
397 relationship for precopulatory traits.

398

399 *The degree of mechanistic overlap influences the strength of association between sexually selected traits*  
400 *and reproductive barriers*

401 Both of the sexual performance phenotypes we examined here are likely a product of multiple  
402 underlying mechanisms, that could vary in their degree of overlap between conspecific and  
403 heterospecific mating contexts and therefore in the expected strength of association between these  
404 contexts. Interestingly, evidence both from prior characterization of these pre- and postcopulatory  
405 performance phenotypes, and from direct genetic studies, suggests that the degree of mechanistic  
406 overlap could be greater for postcopulatory phenotypes. Prior analyses of the mechanics of  
407 postcopulatory sperm success in *Drosophila* indicate that it primarily acts on only three classes of trait:  
408 sperm traits (reviewed in Snook 2005), ejaculate traits (reviewed in Mautz et al. 2013) and female  
409 reproductive responses (including sperm transfer, sperm displacement, sperm ejection, and sperm  
410 selection for fertilization (Manier et al. 2013b, Manier et al. 2010, Miller and Pitnick 2002)). This  
411 circumscribed suite of traits increases the chance that superior male performance against conspecific  
412 and heterospecific males share some physiological mechanisms in common. Within *D. melanogaster*, for  
413 example, in addition to size and speed of sperm—traits that affect displacement success (e.g., Lüpold et  
414 al 2012)—intraspecific sperm success has been shown to vary in part due to female ejection timing  
415 (Lüpold et al 2013). Interspecifically, in *D. simulans* it has been shown that postcopulatory fertilization  
416 success of conspecific males over heterospecific males also depends on both male-mediated sperm  
417 displacement success and female-controlled mechanisms of sperm ejection, among other traits (Manier  
418 et al. 2013a). In addition, in *D. melanogaster* there is direct evidence that these postcopulatory

419 mechanisms also share genes in common (Castillo and Moyle 2014). In assays using the same female line  
420 and the same first male genotypes as examined here, Castillo and Moyle (2014) showed that knockdown  
421 or null lines for two genes (*Acp36DE*, *CG9997*) with known roles in sperm competition within *D.*  
422 *melanogaster* were also significantly less competitive in offensive (second male) sperm competition with  
423 *D. simulans* first males. A third evaluated locus—*Sex Peptide*—is essential for effective sperm  
424 competition among conspecifics (Liu and Kubli 2013), but had no phenotypic effect on competitive  
425 performance against heterospecific first males (Castillo and Moyle 2014). Together, both direct  
426 phenotypic observations and genetic studies provide good evidence that there is some degree of  
427 overlap, although incomplete, in the mechanisms that mediate postcopulatory sperm success when  
428 competing against conspecific and heterospecific males.

429         In contrast, a much larger range of traits could mediate the precopulatory success of males in  
430 persuading *Drosophila* females to remate (reviewed Markow et al. 2005), including a complex set of  
431 non-independent behavioral cues (Welbergen et al. 1992) as well as several mating signals along at least  
432 two sensory axes – acoustic (reviewed Hoikkala 2005) and chemosensory (reviewed Chung and Carrol  
433 2015). Intraspecifically, *D. melanogaster* females are known to use both acoustic (e.g., pulse songs with  
434 more pulse (Talyn and Dowse 2003)) and chemical signals (e.g., presence and abundance of male  
435 pheromone 7-Tricosene; Billeter et al. 2009) to evaluate conspecific mating partners. How *D.*  
436 *melanogaster* females discriminate against heterospecific *D. simulans* males is less well understood  
437 (reviewed Sawamura and Tomaru 2002), however courtship song interpulse interval is known to affect  
438 interspecific courtship success (Kyriacou and Hall 1986). Given this broad variety of potentially  
439 important precopulatory traits, it is possible that mechanisms involved in male remating success after  
440 heterospecific versus conspecific first matings are not even on the same sensory axis. Moreover, the  
441 criteria for assessing both the benefit of remating and the suitability of second males, likely varies  
442 depending on the species identity of the first male. Following a heterospecific first male, females will

443 almost certainly benefit from remating by compensating for an unambiguously low quality first mating  
444 (the “rescue effect”, Fricke et. al. 2006), whereas following a conspecific mating, the benefits of  
445 remating are more strongly dependent on whether the second male is a higher quality male (enabling  
446 the female to “trade up”, Byrne and Rice 2005). In the first instance, the criteria for identifying suitable  
447 second mates might be focused more on species-recognition traits, whereas the latter might assess  
448 more nuanced differences in male quality or persistence (although it remains unclear if mate recognition  
449 traits are generally distinct from species recognition traits; reviewed Servedio and Boughman 2017).  
450 Interestingly, our own observations following conspecific first matings suggest that females might  
451 indeed be making these remating decisions based on male quality; generally, male lines with better  
452 precopulatory remating success are also better sperm competitors against conspecifics following this  
453 mating (Figure 6). In contrast, the success of male lines in persuading females to remate following a  
454 heterospecific first mating is uncorrelated with their ability to displace heterospecific sperm (Figure 6).  
455 This discrepancy between these two associations is further evidence that overlap between mechanisms  
456 that underlie these traits is incomplete, as we might otherwise expect to see a similar pattern of success  
457 following a heterospecific mating as we do a conspecific if these mechanisms were identical. In either  
458 case, there are clear reasons that the degree of mechanistic overlap might be expected to differ  
459 systematically between traits involved in precopulatory and postcopulatory male success, when  
460 compared between conspecific and heterospecific first male contexts.

461

#### 462 *Conditions most likely to connect sexual selection and reproductive isolation*

463 As we’ve addressed above, our findings—in conjunction with previous theory and data—suggest  
464 several primary conditions where sexual selection within species is expected to have its largest role in  
465 reproductive isolation. In particular, when female preferences for intraspecific male traits is strong,  
466 these preferences are expected to also contribute to discrimination against heterospecific males. In

467 addition, when a limited number of potential mechanisms underlie mating interactions, the likelihood  
468 that these mechanisms will be involved in both intra- and interspecific contexts is increased. The  
469 importance of pleiotropy between sexually selected traits and isolating barriers is a repeated and  
470 general inference from numerous models of sexual selection and speciation (Ritchie 2007), and the  
471 differences we observe between different mating traits (pre- versus post-copulatory) here might reflect  
472 the overall propensity for these different classes of traits to participate pleiotropically in both sexual  
473 selection and isolation.

474 Finally, apart from these conditions, there are other general factors that might influence the  
475 extent to which some sexually selected traits might be less reliable or consistent contributors to  
476 reproductive isolation. For example, while environmental conditions can play a role in postcopulatory  
477 mating traits (for example, by changing the number or quality of sperm produced, depending upon  
478 physiological condition; reviewed in Pitnick et al. 2009), there are reasons to expect that precopulatory  
479 traits (such as visual, auditory, and other sensory cues) are more directly influenced by external  
480 environmental factors. For example, elaborate courtship traits can make males more apparent to  
481 predators, a potentially important natural selective agent; similarly, the type and intensity of male  
482 signals can be shaped by the environment in which these signals must be transmitted (Boughman 2002).  
483 The extent to which sexual selection and natural selection interact to influence the evolution of isolating  
484 barriers is an area of substantial ongoing research (Boughman 2013, Safran et al. 2013), but clear  
485 examples from the sensory drive literature (Boughman 2001, Seehausen et al. 2008) and elsewhere  
486 (Hardwick et al. 2013) suggest that sexual selection on precopulatory mating traits might often take a  
487 back seat to direct natural selection on these same traits, a conclusion also supported by theory (Van  
488 Doorn et al. 2009, Servedio and Boughman 2017). The operation of additional (and potentially  
489 constraining) forces of natural selection on precopulatory traits is therefore another factor that might

490 favor a stronger role for postcopulatory traits in mediating the connection between sexual selection and  
491 reproductive isolation.

492           Regardless, it is evident that in order for sexual selection to drive speciation, phenotypes  
493 associated with success in one context must also be successful in the other. Here we explicitly tested for  
494 a relationship between sexually selected (intraspecific), and reproductive isolating (interspecific) traits  
495 by comparing male success directly between the two contexts for two different male mating success  
496 traits. While we found little support that sexual selection would be sufficient to drive reproductive  
497 isolation on its own, postcopulatory competitive success appears to act in the same direction in both  
498 contexts. In conjunction with previous evidence that competitive fertilization within and between  
499 species also depends upon some shared genes (Castillo and Moyle 2014) and overlap in mechanisms of  
500 sperm displacement and cryptic female choice (e.g., Manier et al. 2013a) it is clear that sexual selection  
501 on this class of male competitive traits could contribute to elevated reproductive isolation between  
502 species, in the form of competitive heterospecific sperm displacement. In the absence of many empirical  
503 analyses of the direct association between traits important for success in both intra- and inter-specific  
504 interactions, it remains unclear if this observation applies more generally beyond *Drosophila*  
505 *melanogaster* remating traits. Nonetheless, our analysis shows that such direct tests are critical for  
506 assessing sexual selection's relationship with reproductive isolation, including the relative role of sexual  
507 selection could play as a driving force in speciation.

508

## 509 **Acknowledgements**

510           We thank Stuart MacDonald for providing DSPR founder strains for our use, Kristi Montooth for  
511 providing the Austria strain, and Dean Castillo both for help procuring fly strains and for advice on  
512 experimental design. Research was supported by Indiana University Department of Biology funding to  
513 LCM and JSD.



515 **Citations**

- 516 Arbuthnott, D. (2009). The genetic architecture of insect courtship behavior and premating isolation.  
517 *Heredity*, 103(1), 15–22. <http://doi.org/10.1038/hdy.2009.22>
- 518 Begun, D. J., Whitley, P., Todd, B. L., Waldrip-dail, H. M., & Clark, A. G. (2000). Molecular Population  
519 Genetics of Male Accessory Gland Proteins in *Drosophila*. *Genetics*, 156, 1879–1888.
- 520 Billeter, J.-C., Atallah, J., Krupp, J. J., Millar, J. G., & Levine, J. D. (2009). Specialized cells tag sexual and  
521 species identity in *Drosophila melanogaster*. *Nature*, 461(7266), 987–991.  
522 <http://doi.org/10.1038/nature08495>
- 523 Bjork, A., Starmer, W. T., Higginson, D. M., Rhodes, C. J., & Pitnick, S. (2007). Complex interactions with  
524 females and rival males limit the evolution of sperm offence and defence. *Proceedings of the Royal  
525 Society B: Biological Sciences*, 274(1619), 1779–1788. <http://doi.org/10.1098/rspb.2007.0293>
- 526 Bolnick, D. I., & Kirkpatrick, M. (2012). The relationship between intraspecific assortative mating and  
527 reproductive isolation between divergent populations. *Current Zoology*, 58(3), 484–492.  
528 <http://doi.org/10.1086/343878>
- 529 Boorman, E., & Parker, G. A. (1976). Sperm (ejaculate) competition in *Drosophila melanogaster*, and the  
530 reproductive value of females to males in relation to female age and mating status. *Evolutionary  
531 Entomology*, 1, 145–155.
- 532 Boughman, J. W. (2013). Ecological speciation : Selection and the origin of species Ecological speciation :  
533 Selection and the origin of species. *Current Zoology*, 59(1), 1–7.  
534 <http://doi.org/10.1093/czoolo/59.1.1>
- 535 Boughman, J. W. (2001). Divergent sexual selection enhances reproductive isolation in sticklebacks.  
536 *Nature*, 411(June), 944–948.
- 537 Boul, K. E., Chris Funk, W., Darst, C. R., Cannatella, D. C., & Ryan, M. J. (2007). Sexual selection drives  
538 speciation in an Amazonian frog. *Proceedings of the Royal Society B: Biological Sciences*, 274(1608),  
539 399–406. <http://doi.org/10.1098/rspb.2006.3736>
- 540 Byrne, P. G., & Rice, W. R. (2005). Remating in *Drosophila melanogaster*: An examination of the trading-  
541 up and intrinsic male-quality hypotheses. *Journal of Evolutionary Biology*, 18(5), 1324–1331.  
542 <http://doi.org/10.1111/j.1420-9101.2005.00918.x>
- 543 Castillo, D. M., Moyle, L. C., & Castillo, D. M. (2014). Intraspecific sperm competition genes enforce post-  
544 mating species barriers in *Drosophila*. *Proceedings of the Royal Society B*, 281(20142050), 1–8.
- 545 Chung, H., & Carroll, S. B. (2015). Wax, sex and the origin of species: Dual roles of insect cuticular  
546 hydrocarbons in adaptation and mating. *BioEssays*, 37(7), 822–830.  
547 <http://doi.org/10.1002/bies.201500014>



- 548 Civetta, A., & Finn, S. (2014). Do Candidate Genes Mediating Conspecific Sperm Precedence Affect  
549 Sperm Competitive Ability Within Species? A Test Case in *Drosophila*. *G3*, 4(September), 1–28.  
550 <http://doi.org/10.1534/g3.114.012476>
- 551 Clark, A. G., Begun, D. J., & Prout, T. (1999). Female x male interactions in *Drosophila* sperm  
552 competition. *Science*, 283(5399), 217–220. <http://doi.org/10.1126/science.283.5399.217>
- 553 Clark, A. G., Aguade, M., Prout, T., Harshman, L. G., & Langley, C. H. (1995). Variation in sperm  
554 displacement and its association with accessory gland protein loci in *Drosophila melanogaster*.  
555 *Genetics*, 139(1), 189–201.
- 556 Findlay, G. D., Yi, X., Maccoss, M. J., & Swanson, W. J. (2008). Proteomics Reveals Novel *Drosophila*  
557 Seminal Fluid Proteins Transferred at Mating. *PLoS Biology*, 6(7).  
558 <http://doi.org/10.1371/journal.pbio>
- 559 Fricke, C., Arnqvist, G., & Amaro, N. (2006). Female modulation of reproductive rate and its role in  
560 postmating prezygotic isolation in *Callosobruchus maculatus*. *Functional Ecology*, 20(2), 360–368.  
561 <http://doi.org/10.1111/j.1365-2435.2006.01102.x>
- 562 Gavrilets, S. (2000). Rapid evolution of reproductive barriers driven by sexual conflict. *Nature*,  
563 403(6772), 886–889. <http://doi.org/10.1038/35002564>
- 564 Gavrilets, S., & Waxman, D. (2002). Sympatric speciation by sexual conflict. *Proceedings of the National*  
565 *Academy of Sciences of the United States of America*, 99(16), 10533–10538.  
566 <http://doi.org/10.1073/pnas.152011499>
- 567 Gromko, M. H., & Markow, T. A. (1993). Courtship and remating in field populations of *Drosophila*.  
568 *Animal Behaviour*, 45(2), 253–262. <http://doi.org/10.1006/anbe.1993.1031>
- 569 Groot, A. T., Staudacher, H., Barthel, A., Inglis, O., Schöfl, G., Santangelo, R. G., ... Gould, F. (2013). One  
570 quantitative trait locus for intra- and interspecific variation in a sex pheromone. *Molecular Ecology*,  
571 22(4), 1065–1080. <http://doi.org/10.1111/mec.12171>
- 572 Hardwick, K. M., Robertson, J. M., & Rosenblum, E. B. (2013). Asymmetrical mate preference in recently  
573 adapted White Sands and black lava populations of *Sceloporus undulatus*. *Current Zoology*, 59(1),  
574 20–30.
- 575 Harshman, L. G., & Clark, A. G. (1998). Inference of Sperm Competition from Broods of Field-Caught  
576 *Drosophila*. *Evolution*, 52(5), 1334–1341.
- 577 Higashi, M., Takimoto, G., & Yamamura, N. (1999). Sympatric speciation by sexual selection. *Nature*,  
578 402(6761), 523–526. <http://doi.org/10.1038/990087>
- 579 Hoikkala, A. (2005). Inheritance of male sound characteristics in *Drosophila* species. *Insect sounds and*  
580 *communication: Physiology, behaviour, ecology and evolution*, 167-177.

- 581 Imhof, M., Harr, B., Brem, G., & Schlötterer, C. (1998). Multiple mating in wild *Drosophila melanogaster*  
582 revisited by microsatellite analysis. *Molecular Ecology*, 7(7), 915–917.  
583 <http://doi.org/10.1046/j.1365-294x.1998.00382.x>
- 584 King, E. G., Merkes, C. M., McNeil, C. L., Hofer, S. R., Sen, S., Broman, K. W., ... Macdonald, S. J. (2012).  
585 Genetic dissection of a model complex trait using the *Drosophila* Synthetic Population Resource.  
586 *Genome Research*, 22(8), 1558–66. <http://doi.org/10.1101/gr.134031.111>
- 587 Kirkpatrick, M., & Nuismer, S. L. (2004). Sexual selection can constrain sympatric speciation.  
588 *Proceedings. Biological Sciences / The Royal Society*, 271(1540), 687–693.  
589 <http://doi.org/10.1098/rspb.2003.2645>
- 590 Kirkpatrick, M., & Ravigne, V. (2015). Speciation by Natural and Sexual Selection : Models and  
591 Experiments. *The American Naturalist*, 159(March 2002).
- 592 Kyriacou, C. P., & Hall, J. C. (2013). Interspecific Genetic Control of Courtship Song Production and  
593 Reception in *Drosophila* Author ( s ): C . P . Kyriacou and Jeffrey C . Hall Published by : American  
594 Association for the Advancement of Science Stable URL : <http://www.jstor.org/stable/1696421>.  
595 *Science*, 232(4749), 494–497.
- 596 Kondrashov, A. S., & Shpak, M. (1998). On the origin of species by means of assortative mating.  
597 *Proceedings of the Royal Society B: Biological Sciences*, 265(1412), 2273–2278.  
598 <http://doi.org/10.1098/rspb.1998.0570>
- 599 Letsinger, J. T., & Gromko, M. H. (1984). *Drosophila melanogaster*. *Genetica*, 66(3), 195–202.
- 600 Liu, H., & Kubli, E. (2003). Sex-peptide is the molecular basis of the sperm effect in *Drosophila*  
601 *melanogaster*. *Proceedings of the National Academy of Sciences*, 100(17), 9929–9933.  
602 <http://doi.org/10.1073/pnas.1631700100>
- 603 Lüpold, S., Manier, M. K., Berben, K. S., Smith, K. J., Daley, B. D., Buckley, S. H., Belote, J. M., Pitnick, S.  
604 (2012). How multivariate ejaculate traits determine competitive fertilization success in *drosophila*  
605 *melanogaster*. *Current Biology*, 22(18), 1667–1672. <http://doi.org/10.1016/j.cub.2012.06.059>
- 606 Lüpold, S., Pitnick, S., Berben, K. S., Blengini, C. S., Belote, J. M., & Manier, M. K. (2013). Female  
607 mediation of competitive fertilization success in *Drosophila melanogaster*. *Proceedings of the*  
608 *National Academy of Sciences*, 110(26), 10693–10698. <http://doi.org/10.1073/pnas.1300954110>
- 609 Maan, M. E., & Seehausen, O. (2011). Ecology, sexual selection and speciation. *Ecology Letters*, 14(6),  
610 591–602. <http://doi.org/10.1111/j.1461-0248.2011.01606.x>
- 611 Macias Garcia, C., Smith, G., Gonzalez Zuarth, C., Graves, J. A., & Ritchie, M. G. (2012). Variation in sexual  
612 dimorphism and assortative mating do not predict genetic divergence in the sexually dimorphic  
613 Goodeid fish *Girardinichthys multiradiatus*. *Current Zoology*, 58(3), 440–452.

- 614 Manier, M. K., Belote, J. M., Berben, K. S., Lüpold, S., Ala-Honkola, O., Collins, W. F., & Pitnick, S. (2013b).  
615 Rapid Diversification Of Sperm Precedence Traits And Processes Among Three Sibling *Drosophila*  
616 Species. *Evolution*, 67(8), 2348–2362. <http://doi.org/10.1111/evo.12117>
- 617 Manier, M. K., Belote, J. M., Berben, K. S., Novikov, D., Stuart, W. T., & Pitnick, S. (2010). Resolving  
618 Mechanisms of Competitive Fertilization Success in *Drosophila melanogaster*. *Science*, 328, 1651–  
619 1656. <http://doi.org/10.1016/j.cub.2005.07.065>
- 620 Manier, M. K., Lüpold, S., Belote, J. M., Starmer, W. T., Berben, K. S., Ala-Honkola, O., ... Pitnick, S.  
621 (2013a). Postcopulatory sexual selection generates speciation phenotypes in *Drosophila*. *Current*  
622 *Biology*, 23(19), 1853–1862. <http://doi.org/10.1016/j.cub.2013.07.086>
- 623 Markow, T. A., & O’Grady, P. M. (2005). Evolutionary Genetics of Reproductive Behavior in *Drosophila* :  
624 Connecting the Dots. *Annual Review of Genetics*, 39(1), 263–291.  
625 <http://doi.org/10.1146/annurev.genet.39.073003.112454>
- 626 Mautz, B. S., Møller, A. P., & Jennions, M. D. (2013). Do male secondary sexual characters signal  
627 ejaculate quality? A meta-analysis. *Biological Reviews*, 88(3), 669–682.  
628 <http://doi.org/10.1111/brv.12022>
- 629 Mendelson, T. C., & Shaw, K. L. (2005). Rapid speciation in an arthropod. *Nature*, 433(January).  
630 <http://doi.org/10.1038/nature03320>
- 631 Miller, G. T., & Pitnick, S. (2002). Sperm-Female Coevolution in *Drosophila*. *Science*, 298(5596), 1230–  
632 1233. <http://doi.org/10.1126/science.1076968>
- 633 Neubaum, D. M., & Wolfner, M. F. (1999). Mated *Drosophila melanogaster* females require a seminal  
634 fluid protein, Acp36DE, to store sperm efficiently. *Genetics*, 153(2), 845–857.
- 635 Panhuis, T. M., Butlin, R., Zuk, M., & Tregenza, T. (2001). Sexual Selection and Speciation. *Annual Review*  
636 *of Ecology, Evolution, and Systematics*, 16(7), 364–371.  
637 <http://doi.org/10.1146/annurev.ecolsys.38.091206.095733>
- 638 Parker, G. A., & Partridge, L. (1998). *Philosophical Transactions: Biological Sciences*,. *Philosophical*  
639 *Transactions: Biological Sciences*, 353(1366), 261–274.
- 640 Pitnick, S., Hosken, D. J., & Birkhead, T. R. (2009). *Sperm morphological diversity*. *Sperm Biology* (First  
641 Edit). Elsevier Ltd. <http://doi.org/10.1016/B978-0-12-372568-4.00003-3>
- 642 Price, C. S. C. (1997). Conspecific sperm precedence in *Drosophila*. *Nature*, 388, 663–666.
- 643 Price, C. S. C., Dyer, K. A., & Coyne, J. A. (1999). Sperm competition between *Drosophila* males involves  
644 both displacement and incapacitation. *Nature*, 400(July), 449–452.
- 645 Ritchie, M. G. (2007). Sexual Selection and Speciation. *Annual Review of Ecology, Evolution, and*  
646 *Systematics*, 38(1), 79–102. <http://doi.org/10.1146/annurev.ecolsys.38.091206.095733>

- 647 Safran, R. J., Scordato, E. S. C., Symes, L. B., Rodríguez, R. L., & Mendelson, T. C. (2013). Contributions of  
648 natural and sexual selection to the evolution of premating reproductive isolation: a research  
649 agenda. *Trends in Ecology & Evolution*, 28(11), 643–650.  
650 <http://doi.org/10.1016/j.tree.2013.08.004>
- 651 Sawamura, K., & Tomaru, M. (2002). Biology of reproductive isolation in *Drosophila*: Toward a better  
652 understanding of speciation. *Population Ecology*, 44(3), 209–219.  
653 <http://doi.org/10.1007/s101440200024>
- 654 Seehausen, O., Terai, Y., Magalhaes, I. S., Carleton, K. L., Mrosso, H. D. J., Miyagi, R., ... Okada, N. (2008).  
655 Speciation through sensory drive in cichlid fish. *Nature*, 455. <http://doi.org/10.1038/nature07285>
- 656 Servedio, M. R., & Boughman, J. W. (2017). The Role of Sexual Selection in Local Adaptation and  
657 Speciation. *Annual Review of Ecology, Evolution, and Systematics*, 48(1), annurev-ecolsys-110316-  
658 022905. <http://doi.org/10.1146/annurev-ecolsys-110316-022905>
- 659 Servedio, M. R., & Burger, R. (2014). The counterintuitive role of sexual selection in species maintenance  
660 and speciation. *Proceedings of the National Academy of Sciences*, 111(22), 8113–8118.  
661 <http://doi.org/10.1073/pnas.1316484111>
- 662 Servedio, M. R. (2012). The Relationship between Sexual Selection and Sexual Conflict. *Cold Spring Harb*  
663 *Perspect Biol*, (September), 1–14. <http://doi.org/10.1101/cshperspect.a017517>
- 664 Shaw, K. L., & Parsons, Y. M. (2002). Divergence of Mate Recognition Behavior and Its Consequences for  
665 Genetic Architectures of Speciation. *The American Naturalist*, 159.
- 666 Sirot, L. K., LaFlamme, B. A., Sitnik, J. L., Rubinstein, C. D., Avila, F. W., Chow, C. Y., & Wolfner, M. F.  
667 (2009). Molecular social interactions: *Drosophila melanogaster* seminal fluid proteins as a case  
668 study. *Advances in Genetics*, 68(9), 23–56. [http://doi.org/10.1016/S0065-2660\(09\)68002-0](http://doi.org/10.1016/S0065-2660(09)68002-0)
- 669 Singh, S. R., Singh, B. N., & Hoenigsberg, H. F. (2001). Female remating, sperm competition and sexual  
670 selection in *Drosophila*. *Genetics and Molecular Research*, 1 VN-re(3), 178–215. Retrieved from  
671 <http://www.ncbi.nlm.nih.gov/pubmed/14963827>
- 672 Snook, R. R. (2005). Sperm in competition: Not playing by the numbers. *Trends in Ecology and Evolution*,  
673 20(1), 46–53. <http://doi.org/10.1016/j.tree.2004.10.011>
- 674 Talyn, B. C., & Dowse, H. B. (2004). The role of courtship song in sexual selection and species recognition  
675 by female *Drosophila melanogaster*. *Animal Behaviour*, 68(5), 1165–1180.  
676 <http://doi.org/10.1016/j.anbehav.2003.11.023>
- 677 Ting, J. J., Woodruff, G. C., Leung, G., Shin, N.-R., Cutter, A. D., & Haag, E. S. (2014). Intense sperm-  
678 mediated sexual conflict promotes reproductive isolation in *Caenorhabditis nematodes*. *PLoS*  
679 *Biology*, 12(7), e1001915. <http://doi.org/10.1371/journal.pbio.1001915>
- 680 van Doorn, G. S., Edelaar, P., & Weissing, F. J. (2009). On the Origin of Species by Natural and Sexual  
681 Selection. *Science*, 581(December), 1704–1708.

682 Welbergen, P., Spruijt, B. M., & van Dijken, F. R. (1992). Mating Speed and the Interplay Between Female  
683 and Male Courtship Responses in *Drosophila melanogaster* (Diptera : Drosophilidae). *Journal of*  
684 *Insect Behavior*, 5(2).

685 Wolfner, M. F. (1997). Tokens of love: Functions and regulation of *Drosophila* male accessory gland  
686 products. *Insect Biochemistry and Molecular Biology*, 27(3), 179–192.  
687 [http://doi.org/10.1016/S0965-1748\(96\)00084-7](http://doi.org/10.1016/S0965-1748(96)00084-7)

688 Yang, Y., Richards-Zawacki, C. L., Devar, A., & Dugas, M. B. (2016). Poison frog color morphs express  
689 assortative mate preferences in allopatry but not sympatry. *Evolution*, 70(12), 2778–2788.  
690 <http://doi.org/10.1111/evo.13079>

691

692

693 **Table 1: Mean mating data for each male population. Precopulatory success is represented as**  
 694 **proportion of total trials where P2 males succeeded in securing a remating, and postcopulatory**  
 695 **success is shown as average proportion of total offspring that are sired by the P2 male. Non-**  
 696 **competitive fecundity is shown as average number of adult offspring produced in 24 hours following a**  
 697 **single mating with each male line. Standard error is included for postcopulatory success and non-**  
 698 **competitive fecundity data.**

| P2 male identity |            | Precopulatory success     |                        | Postcopulatory success    |                        |                           |
|------------------|------------|---------------------------|------------------------|---------------------------|------------------------|---------------------------|
|                  |            | Heterospecific first male | Conspecific first male | Heterospecific first male | Conspecific first male | Non-competitive fecundity |
| <b>A1</b>        | Ohio       | 0.727                     | 0.625                  | 0.942 ± 0.11              | 0.457 ± 0.03           | 23.8 ± 2.2                |
| <b>A2</b>        | Colombia   | 0.500                     | 0.217                  | 0.845 ± 0.13              | 0.436 ± 0.05           | 23.4 ± 1.7                |
| <b>A3</b>        | Spain      | 1.000                     | 0.300                  | 0.762 ± 0.05              | 0.095 ± 0.06           | 25.4 ± 1.0                |
| <b>A4</b>        | Zimbabwe   | 1.000                     | 0.625                  | 0.866 ± 0.06              | 0.354 ± 0.03           | 25.0 ± 1.2                |
| <b>A5</b>        | Greece     | 0.888                     | 0.625                  | 0.842 ± 0.09              | 0.222 ± 0.03           | 23.6 ± 0.7                |
| <b>A6</b>        | Georgia    | 0.667                     | 0.556                  | 0.867 ± 0.15              | 0.389 ± 0.06           | 22.6 ± 1.8                |
| <b>A7</b>        | Taiwan     | 1.000                     | 0.714                  | 0.930 ± 0.08              | 0.360 ± 0.02           | 26.0 ± 1.1                |
| <b>B1</b>        | Bermuda    | 0.714                     | 0.625                  | 0.893 ± 0.13              | 0.420 ± 0.03           | 19.8 ± 1.1                |
| <b>B2</b>        | S. Africa  | 0.875                     | 0.375                  | 0.885 ± 0.06              | 0.195 ± 0.03           | 20.2 ± 3.2                |
| <b>B3</b>        | Israel     | 0.667                     | 0.500                  | 0.935 ± 0.09              | 0.283 ± 0.03           | 21.8 ± 1.2                |
| <b>B4</b>        | California | 1.000                     | 0.857                  | 0.935 ± 0.10              | 0.499 ± 0.02           | 23.8 ± 1.4                |
| <b>B5</b>        | Hawaii     | 0.889                     | 0.667                  | 0.955 ± 0.10              | 0.352 ± 0.01           | 25.2 ± 1.8                |
| <b>B6</b>        | Peru       | 0.900                     | 0.556                  | 0.959 ± 0.09              | 0.499 ± 0.01           | 25.2 ± 1.7                |
| <b>B7</b>        | Malaysia   | 0.900                     | 0.333                  | 0.933 ± 0.07              | 0.249 ± 0.02           | 24.8 ± 1.7                |
| <b>WT</b>        | Austria    | 1.000                     | 0.857                  | 0.893 ± 0.02              | 0.488 ± 0.02           | 22.8 ± 3.4                |

699

700

701

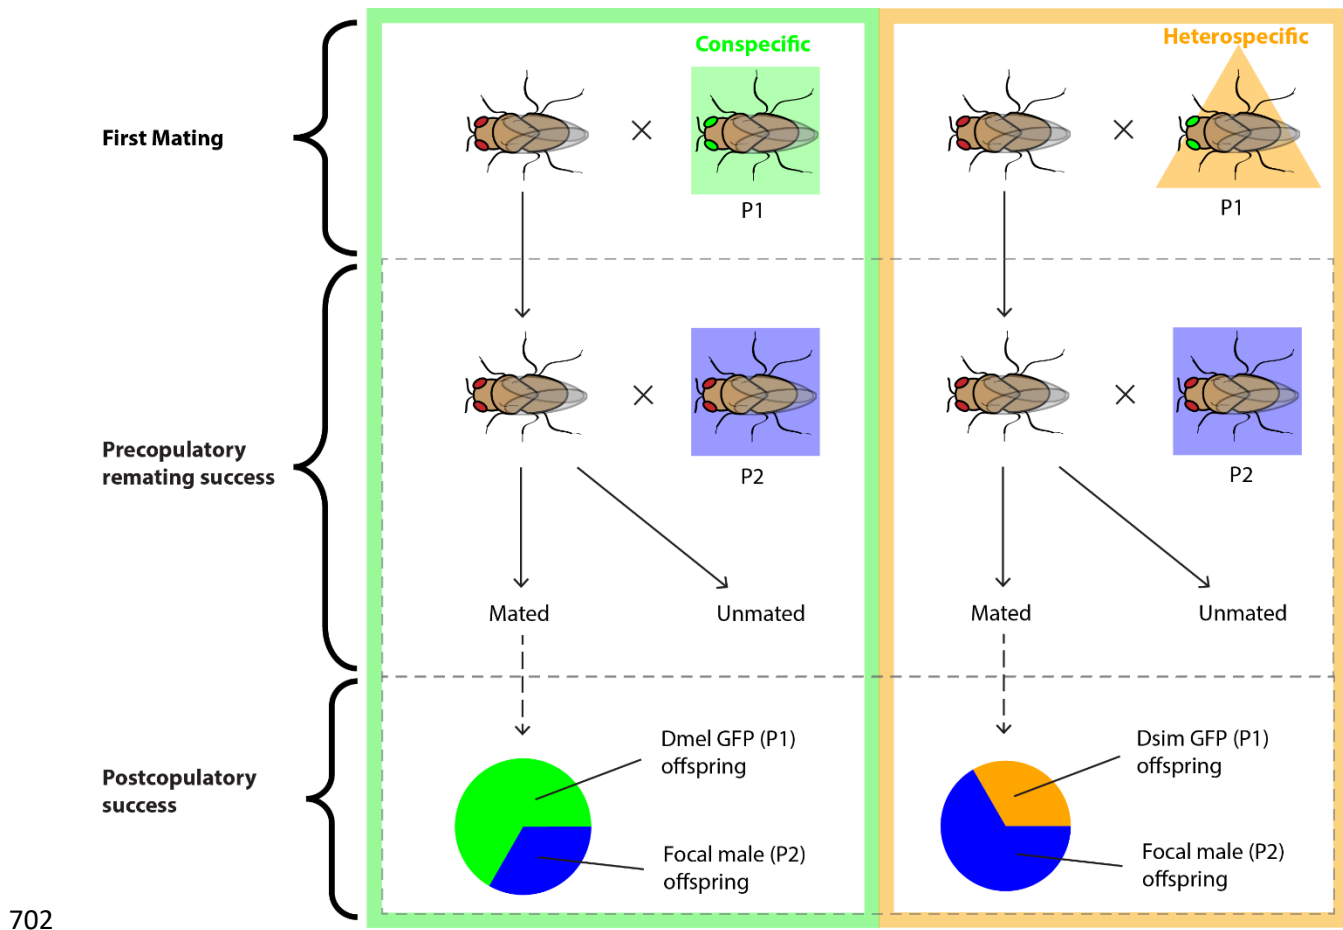

702

703 **Figure 1: Schematic of experimental procedure. The experimental structure for assessing competitive**  
704 **success against conspecific (left) versus heterospecific (right) males is parallel, the only difference**  
705 **being the species identity of the first (P1) GFP-labelled male genotype. In each trial, a single female is**  
706 **first mated with a GFP-labelled first (P1) male before being paired with a second (P2) male drawn**  
707 **from one of the 15 target populations (Table 1). Adult offspring are scored for GFP ocelli after each**  
708 **second pairing, producing two datasets: precopulatory success (judged by presence/absence of wild-**  
709 **type (non-GFP) offspring) and, for pairings in which a second mating is confirmed, postcopulatory**  
710 **success (determined by proportion of offspring sired by P2 male). Both first male GFP genotypes and**  
711 **the female genotype – Austria w132 – are the same for all trials.**

712

713

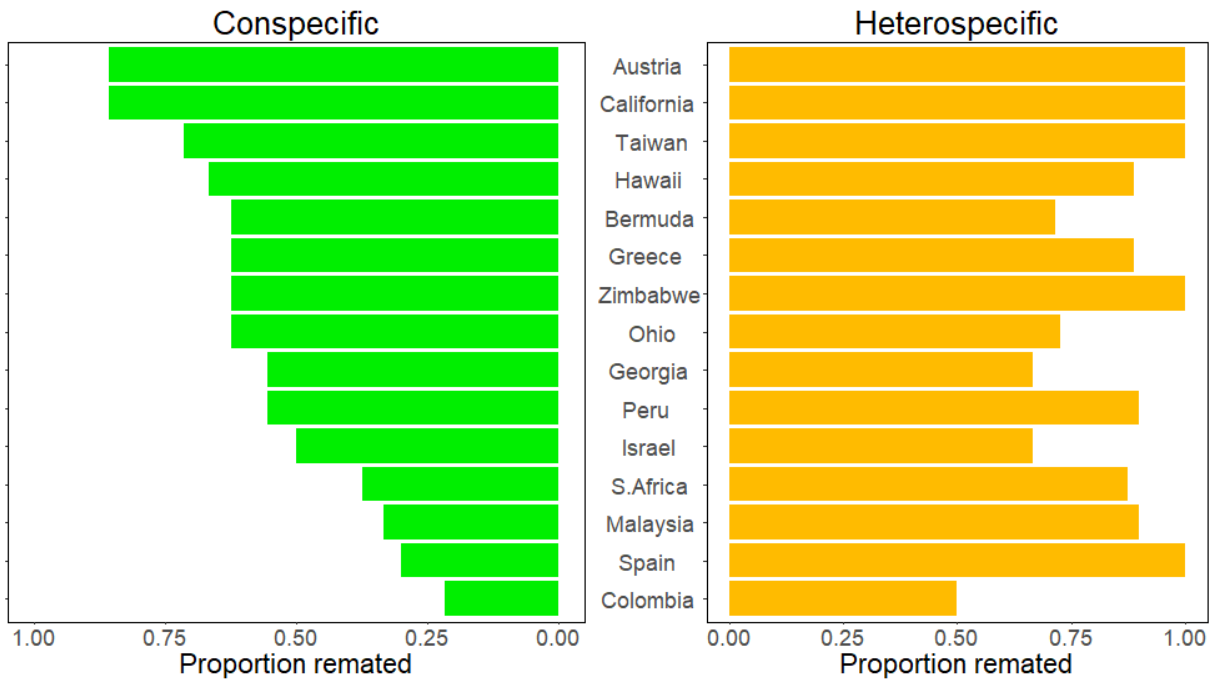

714

715 **Figure 2: Precopulatory remating success following conspecific (left) and heterospecific (right) first**  
716 **matings. Precopulatory success is the proportion of remating trials that resulted in at least one non-**  
717 **GFP offspring, indicating the proportion of trials in which P2 males secured a remating. Male lines**  
718 **significantly vary in their precopulatory success following both conspecific ( $\chi^2 = 24.784$ ;  $P = 0.037$ ) and**  
719 **heterospecific ( $\chi^2 = 23.804$ ;  $P = 0.048$ ) first matings.**



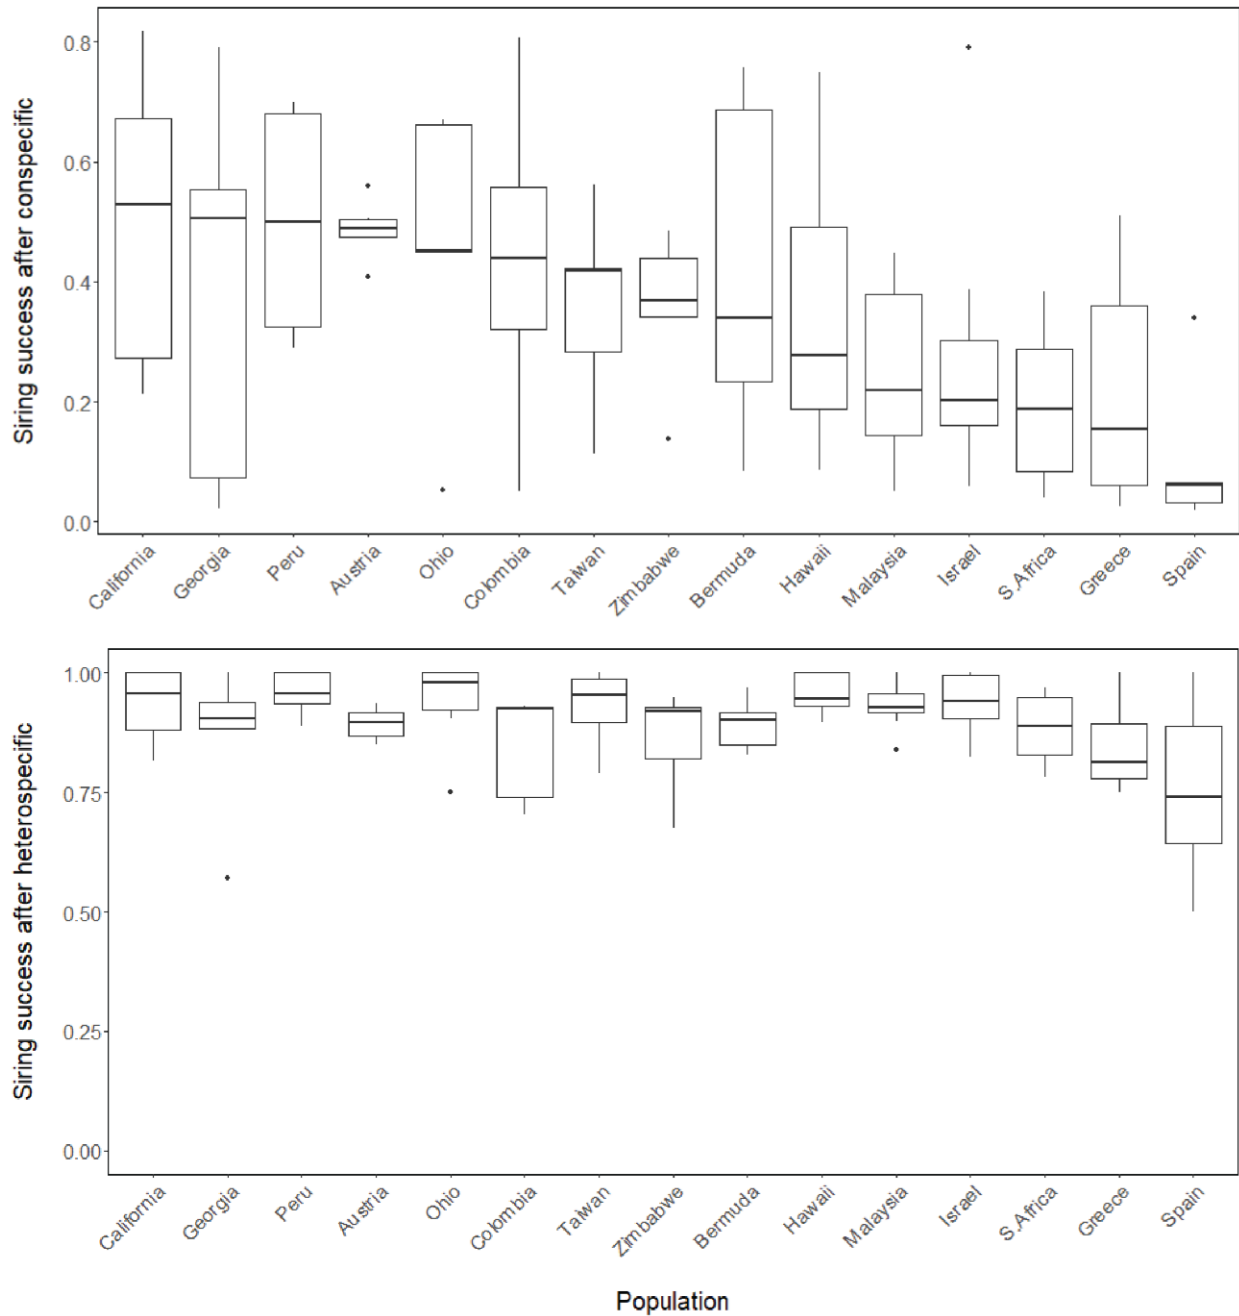

720

721

722

723

724

725

**Figure 3: Postcopulatory siring success of second males from each focal line following intraspecific (top) and interspecific (bottom) first matings. Boxes are mean proportion sired plus the 1<sup>st</sup> and 3<sup>rd</sup> quartiles; lines show standard errors. ANOVA on logit transformed proportions of offspring sired by the P2 male found significant male line effects for sperm competitive success after both conspecific ( $F(14, 25.989)$ ;  $P = 0.006877$ ) and heterospecific ( $F(14, 45.937)$ ;  $P = 0.02192$ ) first matings.**

726

727

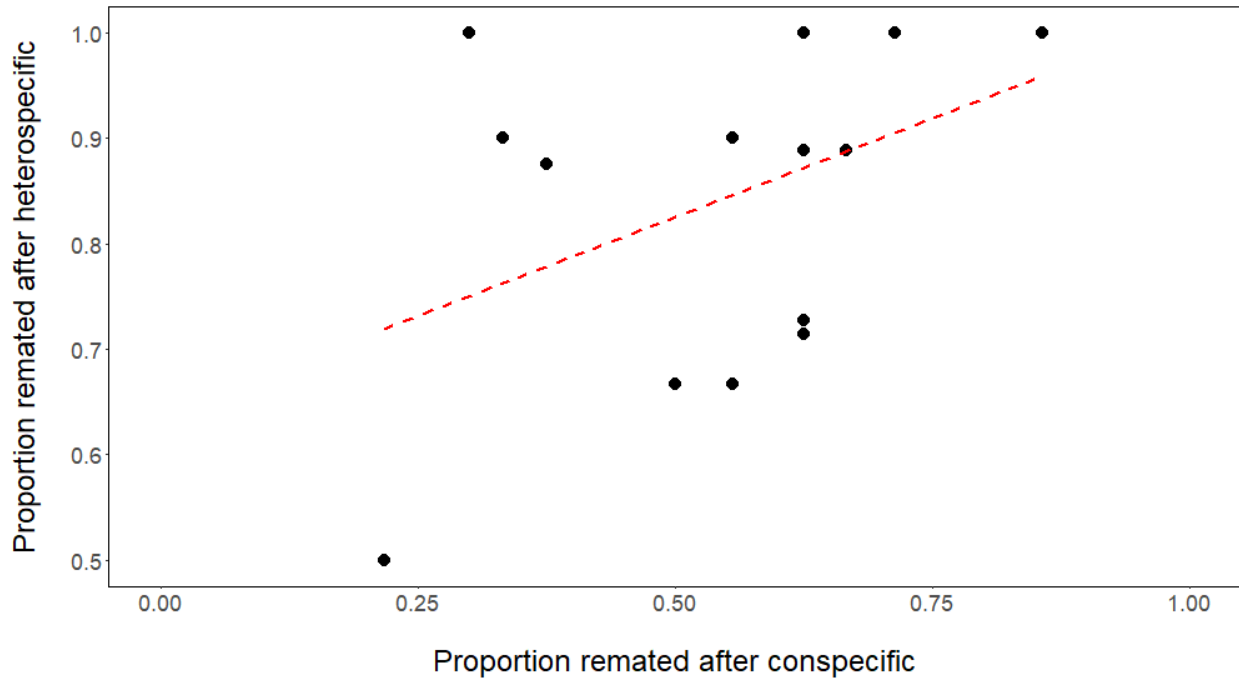

728

729 **Figure 4: Mean precopulatory success of focal male lines after first matings with a conspecific (X-axis)**

730 **versus heterospecific (Y-axis) first male is not significantly correlated ( $r(13) = 0.450$ ,  $P = 0.090$ ). Each**

731 **point represents the proportion of second mating trials that were successful for a focal male line.**

732

733

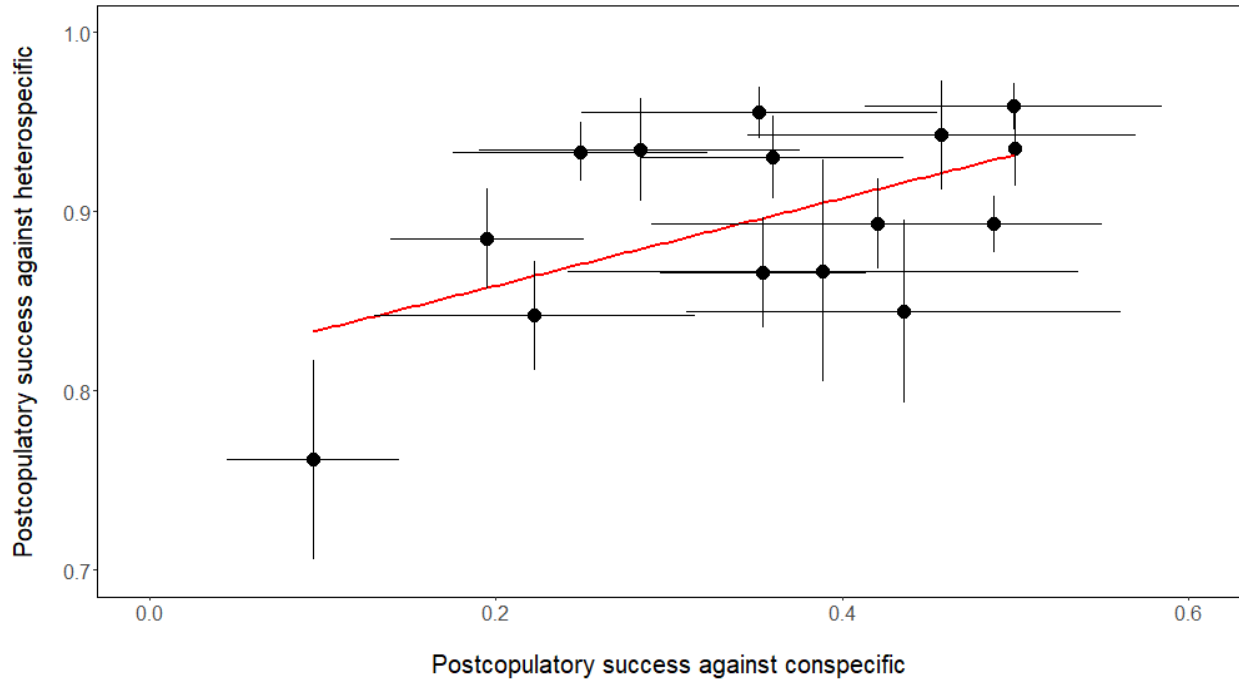

734

735 **Figure 5: Mean postcopulatory competitive success of target male lines following first matings with**  
736 **conspecific (X-axis) or heterospecific (Y-axis) males is significantly correlated ( $r(13) = 0.552$ ,  $P = 0.032$ ).**

737 **Points represent the average proportion of offspring sired by each male genotype, across all trials**  
738 **involving that genotype. The lines represent the standard errors for each population for the two**  
739 **phenotypes.**

740

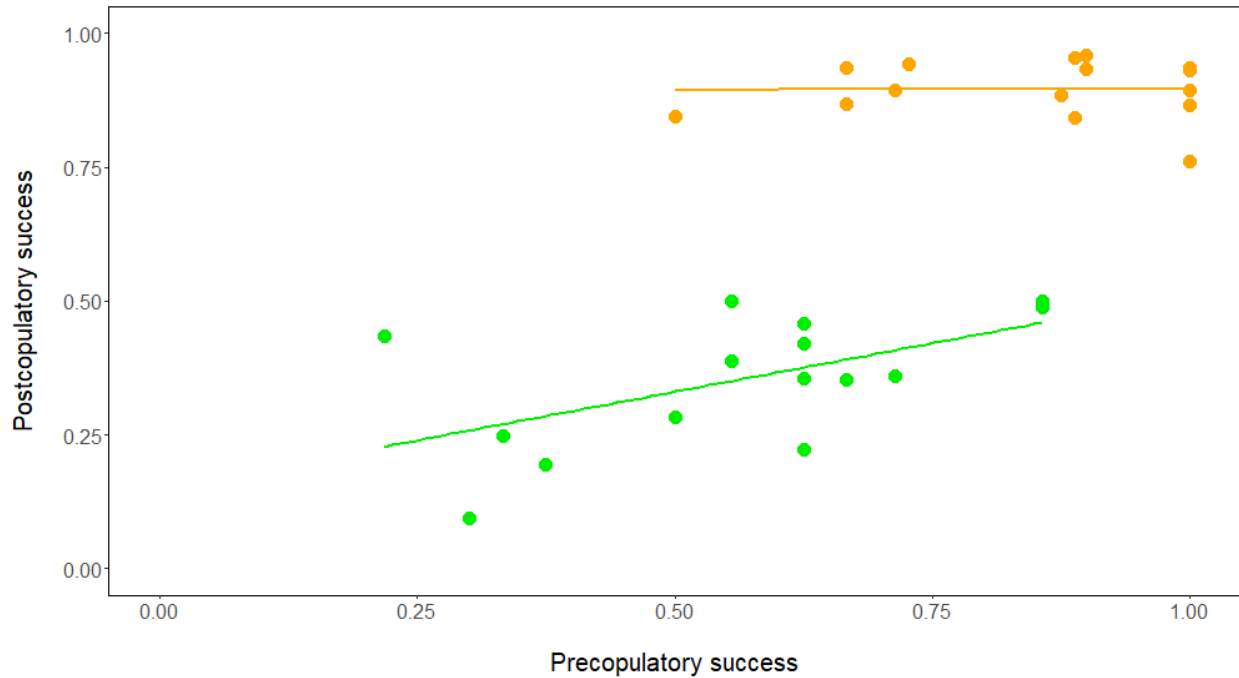

741

742

743

744

745

746

747

**Figure 6: Associations between second male (P2) success at pre- and postcopulatory stages when competing against conspecific males (green) or heterospecific males (orange). For male performance against conspecifics, pre- and postcopulatory success is significantly correlated ( $r(13) = 0.562$ ,  $P = 0.029$ ); pre- and postcopulatory male performance following a heterospecific first mating is unassociated ( $r(13) = 0.014$ ,  $P = 0.959$ ).**
